# Supplementary material for: Distribution and population genetic variation of cryptic species of the Alpine mayfly Baetis alpinus (Ephemeroptera: Baetidae) in the Central Alps
Source: PubMed Central journal article supplement (PMC4828801; doi:10.1186/s12862-016-0643-y), 2016-04-12
Supplement: 12862_2016_643_MOESM1_ESM.pdf [file 12862_2016_643_MOESM1_ESM.pdf]

**Additional file 1. Supplementary tables.**

**Table S1. Sampling site information and population genetic diversity estimates.** Sampling site label, scale of the study, main drainage, river, spatial attributes, sample sizes and summary of genetic diversity at 10 gDNA and cDNA microsatellite loci for two *B. alpinus* cryptic species (labelled *A* and *B*) and *B. melanonyx* identified based on Bayesian and ordination clustering methods (see material and methods in main text). L, local; R, regional;  $N_T$ , total sample size;  $N$ , sample size (values below 8 are on grey background);  $H_E$ , gene diversity within populations;  $A_r$ , allelic richness;  $A_rP$ , private allelic richness;  $A_m$  mean number of alleles; and  $F_{IS}$ , the intrapopulation fixation index ( $*P < 0.0001$ ) are indicated for the two cryptic species. Both  $A_r$  and  $A_rP$  are based on a minimal sample size of  $n = 8$  diploid individuals using El Mousadik & Petit (1996) and Szpiech *et al.* (2008) rarefaction methods, respectively. Rivers lacking a specific name are indicated as -.

| Spatial coordinates |       |          |              |             |           |          |                     |       | <i>B. alpinus</i> (A) |       |       |        |       |          | <i>B. alpinus</i> (B) |       |       |        |       |          | <i>B. melanonyx</i> |       |       |        |       |          |
|---------------------|-------|----------|--------------|-------------|-----------|----------|---------------------|-------|-----------------------|-------|-------|--------|-------|----------|-----------------------|-------|-------|--------|-------|----------|---------------------|-------|-------|--------|-------|----------|
| Label               | Study | Drainage | River        | Locality    | Longitude | Latitude | Elevation (m.a.s.l) | $N_T$ | $N$                   | $H_E$ | $A_r$ | $A_rP$ | $A_m$ | $F_{IS}$ | $N$                   | $H_E$ | $A_r$ | $A_rP$ | $A_m$ | $F_{IS}$ | $N$                 | $H_E$ | $A_r$ | $A_rP$ | $A_m$ | $F_{IS}$ |
| RM1                 | L     | Danube   | Ova da Roseg | Val Roseg   | 9.85867   | 46.41064 | 2106                | 19    | 16                    | 0.76  | 6.355 | 0.209  | 8.1   | 0.160*   | 3                     | -     | -     | -      | -     | -        | 0                   | -     | -     | -      | -     | -        |
| RM2                 | L     | Danube   | Ova da Roseg | Val Roseg   | 9.85753   | 46.41831 | 2054                | 35    | 10                    | 0.722 | 5.989 | 0.163  | 6.6   | 0.127    | 25                    | 0.571 | 4.099 | 0.124  | 5.6   | 0.033    | 0                   | -     | -     | -      | -     | -        |
| RM3                 | L     | Danube   | Ova da Roseg | Val Roseg   | 9.88119   | 46.45869 | 1907                | 34    | 29                    | 0.771 | 6.728 | 0.300  | 10.9  | 0.073    | 5                     | -     | -     | -      | -     | -        | 0                   | -     | -     | -      | -     | -        |
| RT1                 | L     | Danube   | Ova da Roseg | Val Roseg   | 9.84142   | 46.39636 | 2238                | 38    | 1                     | -     | -     | -      | -     | -        | 37                    | 0.530 | 3.766 | 0.1    | 6     | 0.052    | 0                   | -     | -     | -      | -     | -        |
| RT2                 | L     | Danube   | Ova da Roseg | Val Roseg   | 9.85636   | 46.42133 | 2053                | 43    | 4                     | -     | -     | -      | -     | -        | 39                    | 0.541 | 3.803 | 0.102  | 6     | 0.033    | 0                   | -     | -     | -      | -     | -        |
| RT3                 | L     | Danube   | Ova da Roseg | Val Roseg   | 9.86381   | 46.42564 | 2017                | 40    | 12                    | 0.741 | 6.119 | 0.209  | 7.2   | -0.001   | 28                    | 0.551 | 3.993 | 0.136  | 6.1   | 0.015    | 0                   | -     | -     | -      | -     | -        |
| RT4                 | L     | Danube   | Ova da Roseg | Val Roseg   | 9.87458   | 46.44594 | 1964                | 32    | 4                     | -     | -     | -      | -     | -        | 28                    | 0.566 | 3.856 | 0.314  | 5.3   | 0.047    | 0                   | -     | -     | -      | -     | -        |
| JM1                 | L     | Rhine    | Jöribach     | Jörital     | 9.97392   | 46.78758 | 2283                | 40    | 10                    | 0.806 | 6.833 | 0.330  | 7.6   | 0.032    | 30                    | 0.621 | 5.027 | 0.45   | 8     | 0.072    | 0                   | -     | -     | -      | -     | -        |
| JM2                 | L     | Rhine    | Jöribach     | Jörital     | 9.97286   | 46.82083 | 1880                | 40    | 34                    | 0.802 | 6.586 | 0.175  | 11.7  | 0.057    | 6                     | -     | -     | -      | -     | -        | 0                   | -     | -     | -      | -     | -        |
| JT1                 | L     | Rhine    | Jöribach     | Jörital     | 9.97231   | 46.77767 | 2470                | 20    | 10                    | 0.803 | 6.623 | 0.029  | 7.2   | 0.053    | 10                    | 0.621 | 4.61  | 0.273  | 5.0   | 0.05     | 0                   | -     | -     | -      | -     | -        |
| JT2                 | L     | Rhine    | Jöribach     | Jörital     | 9.97508   | 46.78299 | 2403                | 40    | 6                     | -     | -     | -      | -     | -        | 34                    | 0.595 | 4.463 | 0.261  | 7.2   | 0.036    | 0                   | -     | -     | -      | -     | -        |
| JT3                 | L     | Rhine    | Jöribach     | Jörital     | 9.98033   | 46.79267 | 2198                | 40    | 8                     | 0.784 | 5.700 | 0.164  | 5.7   | 0.059    | 32                    | 0.609 | 4.656 | 0.376  | 7.8   | 0.014    | 0                   | -     | -     | -      | -     | -        |
| JT4                 | L     | Rhine    | Jöribach     | Jörital     | 9.981     | 46.8065  | 1971                | 40    | 5                     | -     | -     | -      | -     | -        | 35                    | 0.606 | 4.757 | 0.254  | 7.6   | 0.06     | 0                   | -     | -     | -      | -     | -        |
| JT5                 | L     | Rhine    | Jöribach     | Jörital     | 9.97158   | 46.82583 | 1823                | 40    | 37                    | 0.773 | 6.043 | 0.122  | 10.5  | 0.067    | 3                     | -     | -     | -      | -     | -        | 0                   | -     | -     | -      | -     | -        |
| LM1                 | L     | Rhone    | Anunbach     | Jegital     | 7.89767   | 46.46106 | 2217                | 28    | 27                    | 0.746 | 5.37  | 0.01   | 7.3   | 0.037    | 1                     | -     | -     | -      | -     | -        | 0                   | -     | -     | -      | -     | -        |
| LM2                 | L     | Rhone    | Lonza        | Lötschental | 7.909     | 46.44922 | 2031                | 22    | 22                    | 0.756 | 6.316 | 0.115  | 9.3   | 0.05     | 0                     | -     | -     | -      | -     | -        | 0                   | -     | -     | -      | -     | -        |
| LM3                 | L     | Rhone    | Lonza        | Lötschental | 7.89519   | 46.44436 | 1954                | 29    | 29                    | 0.771 | 6.606 | 0.119  | 10.7  | 0.047    | 0                     | -     | -     | -      | -     | -        | 0                   | -     | -     | -      | -     | -        |
| LM4                 | L     | Rhone    | Lonza        | Lötschental | 7.88553   | 46.44214 | 1888                | 31    | 30                    | 0.747 | 6.366 | 0.171  | 10.5  | 0.08     | 1                     | -     | -     | -      | -     | -        | 0                   | -     | -     | -      | -     | -        |

|                      |   |        |                    |                     |          |           |      |    |    |       |       |       |      |        |    |        |       |       |     |        |    |       |       |       |     |        |
|----------------------|---|--------|--------------------|---------------------|----------|-----------|------|----|----|-------|-------|-------|------|--------|----|--------|-------|-------|-----|--------|----|-------|-------|-------|-----|--------|
| LM5                  | L | Rhone  | Lonza              | Lötschental         | 7.86225  | 46.43386  | 1770 | 38 | 37 | 0.773 | 6.646 | 0.144 | 10.9 | 0.074  | 0  | -      | -     | -     | -   | -      | 1  | -     | -     | -     | -   | -      |
| LT1                  | L | Rhone  | Anunbach           | Jegital             | 7.89825  | 46.46031  | 2215 | 40 | 32 | 0.76  | 5.591 | 0.050 | 8.1  | 0.104  | 8  | 0.396  | 2.800 | 0.039 | 2.8 | 0.305  | 0  | -     | -     | -     | -   | -      |
| LT2                  | L | Rhone  | -                  | Lötschental         | 7.90175  | 46.45144  | 2111 | 35 | 8  | 0.623 | -     | -     | 4.3  | 0.007  | 27 | 0.419  | 2.938 | 0.054 | 3.9 | 0.09   | 0  | -     | -     | -     | -   | -      |
| LT3                  | L | Rhone  | -                  | Lötschental         | 7.88708  | 46.44653  | 2038 | 37 | 14 | 0.675 | 5.124 | 0.044 | 6.2  | 0.027  | 21 | 0.490  | 3.522 | 0.19  | 4.7 | 0.038  | 2  | -     | -     | -     | -   | -      |
| LT4                  | L | Rhone  | -                  | Lötschental         | 7.87547  | 46.44192  | 1968 | 41 | 10 | 0.676 | 4.898 | 0.004 | 5.3  | -0.036 | 16 | 0.484  | 3.398 | 0.046 | 4.1 | 0.044  | 15 | 0.546 | 2.067 | 0.831 | 3.8 | 0.198* |
| LT5                  | L | Rhone  | -                  | Lötschental         | 7.87008  | 46.43767  | 1830 | 39 | 34 | 0.634 | 4.483 | 0.046 | 6.8  | 0.013  | 0  | -      | -     | -     | -   | -      | 5  | -     | -     | -     | -   | -      |
| Da1                  | R | Danube | Ova da Morteratsch | Morteratsch         | 9.93328  | 46.42556  | 2032 | 34 | 34 | 0.752 | 6.327 | 0.227 | 10.6 | 0.077  | 0  | -      | -     | -     | -   | -      | 0  | -     | -     | -     | -   | -      |
| Da2                  | R | Danube | Ova da Morteratsch | Morteratsch         | 9.94125  | 46.45028  | 1899 | 35 | 35 | 0.734 | 5.97  | 0.122 | 10.3 | 0.101  | 0  | -      | -     | -     | -   | -      | 0  | -     | -     | -     | -   | -      |
| Da3                  | R | Danube | -                  | Val Macun           | 10.13625 | 46.73056  | 2434 | 19 | 15 | 0.772 | 6.107 | 0.161 | 7.8  | 0.093  | 4  | -      | -     | -     | -   | -      | 0  | -     | -     | -     | -   | -      |
| Po1                  | R | Po     | Ticino             | Fontana             | 8.55642  | 46.51847  | 1240 | 40 | 39 | 0.795 | 6.677 | 0.203 | 12.2 | 0.065  | 0  | -      | -     | -     | -   | -      | 1  | -     | -     | -     | -   | -      |
| Po2                  | R | Po     | -                  | Bogno               | 9.07819  | 46.09653  | 1526 | 28 | 28 | 0.748 | 5.817 | 0.333 | 9.3  | -0.003 | 0  | -      | -     | -     | -   | -      | 0  | -     | -     | -     | -   | -      |
| Ri1                  | R | Rhine  | Gelgia             | Bivio               | 9.69936  | 46.46497  | 2033 | 40 | 3  | -     | -     | -     | -    | -      | 35 | 0.601  | 4.741 | 0.315 | 8.4 | 0.035  | 2  | -     | -     | -     | -   | -      |
| Ri2                  | R | Rhine  | Lavtinabach        | Pizol               | 9.36575  | 46.96208  | 1844 | 40 | 33 | 0.764 | 6.272 | 0.285 | 10.5 | 0.038  | 7  | -      | -     | -     | -   | -      | 0  | -     | -     | -     | -   | -      |
| Ri3                  | R | Rhine  | Furshbach          | Fursh               | 9.22743  | 47.04449  | 1989 | 23 | 23 | 0.749 | 5.659 | 0.081 | 7.1  | 0.179* | 0  | -      | -     | -     | -   | -      | 0  | -     | -     | -     | -   | -      |
| Ri4                  | R | Rhine  | Wängibach          | Speer               | 9.111211 | 47.185003 | 1372 | 45 | 10 | 0.782 | 5.956 | 0.111 | 6.4  | 0.097  | 1  | -      | -     | -     | -   | -      | 34 | 0.541 | 2.223 | 1.083 | 5.8 | 0.283* |
| Ri5                  | R | Rhine  | Chraterlibach      | Chli Aubrig         | 8.8628   | 47.11181  | 1310 | 12 | 12 | 0.779 | 6.069 | 0.248 | 7.1  | 0.072  | 0  | -      | -     | -     | -   | -      | 0  | -     | -     | -     | -   | -      |
| Ri6                  | R | Rhine  | Reuss              | Wattigen            | 8.59403  | 46.68267  | 1015 | 39 | 39 | 0.764 | 6.261 | 0.281 | 11.5 | 0.097* | 0  | -      | -     | -     | -   | -      | 0  | -     | -     | -     | -   | -      |
| Ri7                  | R | Rhine  | Engelberger Aa     | Surenenpass         | 8.54317  | 46.83147  | 2089 | 40 | 25 | 0.779 | 6.267 | 0.137 | 9.6  | 0.148* | 15 | 0.529  | 4.046 | 0.477 | 5   | -0.033 | 0  | -     | -     | -     | -   | -      |
| Ri8                  | R | Rhine  | -                  | Engstlenalp         | 8.34072  | 46.77886  | 1827 | 31 | 19 | 0.782 | 5.681 | 0.466 | 7.1  | 0.013  | 4  | -      | -     | -     | -   | -      | 8  | 0.493 | 1.864 | 0.688 | 3.5 | 0.341* |
| Ri9                  | R | Rhine  | Waldemme           | Sörenberg<br>Grosse | 8.06475  | 46.80481  | 1165 | 12 | 12 | 0.732 | 5.808 | 0.113 | 6.8  | 0.106  | 0  | -      | -     | -     | -   | -      | 0  | -     | -     | -     | -   | -      |
| Ri10                 | R | Rhine  | Briggbach          | Sheidegg            | 8.09286  | 46.64786  | 1688 | 37 | 3  | -     | -     | -     | -    | -      | 0  | -      | -     | -     | -   | -      | 34 | 0.435 | 2.922 | 0.583 | 4.1 | 0.284* |
| Ri11                 | R | Rhine  | -                  | Mürren              | 7.88272  | 46.58186  | 1797 | 28 | 27 | 0.697 | 4.752 | 0.028 | 6.2  | 0.013  | 1  | -      | -     | -     | -   | -      | 0  | -     | -     | -     | -   | -      |
| Ri12                 | R | Rhine  | -                  | Augstchummi         | 7.79456  | 46.52219  | 1863 | 40 | 40 | 0.729 | 5.487 | 0.197 | 8.2  | 0.174* | 0  | -      | -     | -     | -   | -      | 0  | -     | -     | -     | -   | -      |
| Ri13                 | R | Rhine  | Torneresse         | L'Etivaz            | 7.14747  | 46.42272  | 1150 | 20 | 20 | 0.836 | 7.055 | 0.278 | 9.9  | 0.091  | 0  | -      | -     | -     | -   | -      | 0  | -     | -     | -     | -   | -      |
| Ri14                 | R | Rhine  | L'Hongrin          | Les Mosses          | 7.103556 | 46.409333 | 1400 | 14 | 13 | 0.844 | 7.229 | 0.399 | 8.9  | 0.071  | 0  | -      | -     | -     | -   | -      | 1  | -     | -     | -     | -   | -      |
| Ro1                  | R | Rhone  | Chilchenwengbach   | Nufenenpass         | 8.36997  | 46.47628  | 1900 | 40 | 13 | 0.763 | 5.689 | 0.168 | 6.7  | 0.043  | 20 | 0.534  | 4.336 | 0.443 | 5.9 | 0.083  | 7  | -     | -     | -     | -   | -      |
| Ro2                  | R | Rhone  | Le Rhône           | Grensiols           | 8.08539  | 46.37322  | 860  | 40 | 38 | 0.802 | 6.227 | 0.12  | 9.8  | 0.06   | 0  | -      | -     | -     | -   | -      | 2  | -     | -     | -     | -   | -      |
| Ro3                  | R | Rhone  | Turtmäna           | Meinden             | 7.69742  | 46.19728  | 1860 | 40 | 39 | 0.788 | 6.000 | 0.125 | 9.8  | 0.034  | 1  | -      | -     | -     | -   | -      | 0  | -     | -     | -     | -   | -      |
| Ro4                  | R | Rhone  | Le Trient          | Trient              | 6.99417  | 46.05222  | 1307 | 36 | 36 | 0.806 | 6.525 | 0.357 | 11.6 | 0.081  | 0  | -      | -     | -     | -   | -      | 0  | -     | -     | -     | -   | -      |
| Ro5                  | R | Rhone  | Le Doubs           | Les Moulins         | 7.05886  | 47.30538  | 476  | 17 | 16 | 0.749 | 5.768 | 0.348 | 7.7  | 0.124  | 1  | -      | -     | -     | -   | -      | 0  | -     | -     | -     | -   | -      |
| Mean locus estimates |   |        |                    |                     |          |           |      |    |    | 0.758 | 6.049 | 0.182 | 8.54 | 0.070* |    | 0.5449 | 4.048 | 0.233 | 5.8 | 0.048* |    | 0.504 | 2.269 | 0.796 | 4.3 | 0.246* |

References:

El Mousadik A, Petit RJ: **High level of genetic differentiation for allelic richness among populations of the argan tree *Argania spinosa* (L) Skeels endemic to Morocco.** *Theoretical and Applied Genetics* 1996, **92**(7):832-839

Szpiech ZA, Jakobsson M, Rosenberg NA: **ADZE: a rarefaction approach for counting alleles private to combinations of populations.** *Bioinformatics* 2008, **24**(21):2498-2504

**Table S2. Characteristics and amplification conditions of *Baetis alpinus* microsatellite loci used in this study.** Observed numbers of alleles and allelic size ranges are provided in Table S4.

| Name                   | GenBank<br>Accession n° | Primer sequence (5'-3')                                  | Repeat<br>type     | Primer concentration<br>( $\mu\text{M}$ ) <sup>a</sup> | Dye     |
|------------------------|-------------------------|----------------------------------------------------------|--------------------|--------------------------------------------------------|---------|
| <b>Multiplex set 1</b> |                         |                                                          |                    |                                                        |         |
| <i>Ba_g1</i>           |                         | F : TGCATCGAGGGACACAATCG<br>R : *TAAAGAGAAAACTGGTCCTCGC  | (AC) <sub>12</sub> | 0.04                                                   | FAM     |
| <i>Ba_g2</i>           |                         | F : TGAGCAGATTACCACCACCG<br>R : GCGATGGGTTCGGAAATGAG     | (GT) <sub>14</sub> | 0.04                                                   | FAM     |
| <i>Ba_g3</i>           |                         | F : GACGACTAGTGAGAGCAGGC<br>R : *ACGCGGCCCAATTATCTCTC    | (TG) <sub>12</sub> | 0.04                                                   | ATTO565 |
| <i>Ba_g4</i>           |                         | F : TTGAGCATCGCCGAATCAAC<br>R : TTCGCTCTGGTGTATGGGTG     | (GA) <sub>13</sub> | 0.06                                                   | ATTO550 |
| <i>Ba_c1</i>           |                         | F : CTGCGCACTAAACCCTTCTG<br>R : *TCTAGCGGTTAAAGTGTCTCG   | (CA) <sub>12</sub> | 0.04                                                   | ATTO532 |
| <b>Multiplex set 2</b> |                         |                                                          |                    |                                                        |         |
| <i>Ba_g5</i>           |                         | F : TGTTTCGTCTCTATCCCGCAG<br>R : *TGTA ACTCTCTCGGTGATGTC | (AC) <sub>17</sub> | 0.08                                                   | FAM     |
| <i>Ba_g6</i>           |                         | F : GCGCGTTTTTA ACTCAAATGAAAG<br>R : *TAGGCAGGCAAGGCGGAC | (TG) <sub>16</sub> | 0.08                                                   | FAM     |
| <i>Ba_c2</i>           |                         | F : TCAGGAAACCACTTCCCGAG<br>R : GCATGTCCACGCCATGTATC     | (GCG) <sub>7</sub> | 0.04                                                   | ATTO565 |
| <i>Ba_c3</i>           |                         | F : TATCCAATCCCACGCACTCC<br>R : GAAGCGGACGTGGTTATGTG     | (AC) <sub>11</sub> | 0.04                                                   | ATTO550 |

|              |                           |                    |      |         |
|--------------|---------------------------|--------------------|------|---------|
| <i>Ba_c4</i> | F : TGGCTCCTCCAAGTACAACG  | (AC) <sub>13</sub> | 0.08 | ATTO532 |
|              | R : *CGTACGCACACACTGACATC |                    |      |         |

---

<sup>a</sup> Primer concentration indicates the concentration of the respective primers in the multiplex reaction.

\* indicates “pigtail” sequence as described in Brownstein *et al.* (1996).

Reference:

Brownstein, MJ., J. D. Carpten, Smith JR: **Modulation of non-templated nucleotide addition by taq DNA polymerase: Primer modifications that facilitate genotyping.** *Biotechniques* 1996, **20**(6): 1004-1010

**Table S3. List of available published sequences from GenBank and unpublished sequences used in this study.** Species, GenBank accession number, label used in the reference study, haplotype label used in our study, mountain range and country where the samples were collected, and reference study or provider are shown.

| <b>Species</b>         | <b>Accession</b> | <b>Specimen</b> | <b>Haplotype</b> | <b>Mountain range</b> | <b>Country</b> | <b>Reference</b> |
|------------------------|------------------|-----------------|------------------|-----------------------|----------------|------------------|
| <i>B. alpinus</i> (ss) | LT546400         | Ri12-1-1        | alp_A_H1         | Central Alps          | Switzerland    | This study       |
| <i>B. alpinus</i> (ss) | LT546400         | Da3-1-4         | alp_A_H1         | Central Alps          | Switzerland    | This study       |
| <i>B. alpinus</i> (ss) | LT546401         | Ri12-1-3        | alp_A_H2         | Central Alps          | Switzerland    | This study       |
| <i>B. alpinus</i> (ss) | LT546402         | Ri8-1-2         | alp_A_H3         | Central Alps          | Switzerland    | This study       |
| <i>B. alpinus</i> (ss) | LT546403         | Ri8-1-3         | alp_A_H4         | Central Alps          | Switzerland    | This study       |
| <i>B. alpinus</i> (ss) | LT546404         | Po1-1-2         | alp_A_H5         | Central Alps          | Switzerland    | This study       |
| <i>B. alpinus</i> (ss) | LT546404         | Po1-3-2         | alp_A_H5         | Central Alps          | Switzerland    | This study       |
| <i>B. alpinus</i> (ss) | LT546405         | Po1-4-2         | alp_A_H6         | Central Alps          | Switzerland    | This study       |
| <i>B. alpinus</i> (ss) | LT546405         | Ro2-1-1         | alp_A_H6         | Central Alps          | Switzerland    | This study       |
| <i>B. alpinus</i> (ss) | LT546406         | Po1-5-4         | alp_A_H7         | Central Alps          | Switzerland    | This study       |
| <i>B. alpinus</i> (ss) | LT546406         | Ro2-1-3         | alp_A_H7         | Central Alps          | Switzerland    | This study       |
| <i>B. alpinus</i> (ss) | LT546406         | LT1-1-1         | alp_A_H7         | Central Alps          | Switzerland    | This study       |
| <i>B. alpinus</i> (ss) | LT546406         | Da3-1-5         | alp_A_H7         | Central Alps          | Switzerland    | This study       |
| <i>B. alpinus</i> (ss) | LT546406         | Da1-1-2         | alp_A_H7         | Central Alps          | Switzerland    | This study       |
| <i>B. alpinus</i> (ss) | LT546406         | RM3-3-3         | alp_A_H7         | Central Alps          | Switzerland    | This study       |
| <i>B. alpinus</i> (ss) | LT546406         | RT3-4-1         | alp_A_H7         | Central Alps          | Switzerland    | This study       |
| <i>B. alpinus</i> (ss) | LT546407         | JT5-1-1         | alp_A_H8         | Central Alps          | Switzerland    | This study       |
| <i>B. alpinus</i> (ss) | LT546408         | Ri2-1-1         | alp_A_H9         | Central Alps          | Switzerland    | This study       |
| <i>B. alpinus</i> (ss) | LT546409         | LM1-4-5         | alp_A_H10        | Central Alps          | Switzerland    | This study       |
| <i>B. alpinus</i> (ss) | LT546410         | LM3-1-1         | alp_A_H11        | Central Alps          | Switzerland    | This study       |
| <i>B. alpinus</i> (ss) | LT546411         | LM3-1-4         | alp_A_H12        | Central Alps          | Switzerland    | This study       |
| <i>B. alpinus</i> (ss) | LT546411         | LT1-1-6         | alp_A_H12        | Central Alps          | Switzerland    | This study       |
| <i>B. alpinus</i> (ss) | LT546412         | LM3-5-4         | alp_A_H13        | Central Alps          | Switzerland    | This study       |
| <i>B. alpinus</i> (ss) | LT546413         | LT1-1-2         | alp_A_H14        | Central Alps          | Switzerland    | This study       |

|                        |          |          |            |              |             |                                                           |
|------------------------|----------|----------|------------|--------------|-------------|-----------------------------------------------------------|
| <i>B. alpinus</i> (ss) | LT546413 | LT5-1-1  | alp_A_H14  | Central Alps | Switzerland | This study                                                |
| <i>B. alpinus</i> (ss) | LT546414 | LT2-1-2  | alp_A_H15  | Central Alps | Switzerland | This study                                                |
| <i>B. alpinus</i> (ss) | LT546415 | LT2-1-3  | alp_A_H16  | Central Alps | Switzerland | This study                                                |
| <i>B. alpinus</i> (ss) | LT546416 | RT3-3-3  | alp_A_H17  | Central Alps | Switzerland | This study                                                |
| <i>B. alpinus</i> (ss) | LT546417 | Ro3-4-4  | alp_A_H18  | Central Alps | Switzerland | This study                                                |
| <i>B. alpinus</i> (ss) | LT546417 | Ro3-4-7  | alp_A_H18  | Central Alps | Switzerland | This study                                                |
| <i>B. alpinus</i> (ss) | LT546418 | Ri1-1-2  | alp_Be_H1  | Central Alps | Switzerland | This study                                                |
| <i>B. alpinus</i> (ss) | LT546418 | JT5-1-5  | alp_Be_H1  | Central Alps | Switzerland | This study                                                |
| <i>B. alpinus</i> (ss) | LT546419 | Ri1-1-3  | alp_Be_H2  | Central Alps | Switzerland | This study                                                |
| <i>B. alpinus</i> (ss) | LT546420 | RM3-1-3  | alp_Be_H3  | Central Alps | Switzerland | This study                                                |
| <i>B. alpinus</i> (ss) | LT546420 | RT3-1-1  | alp_Be_H3  | Central Alps | Switzerland | This study                                                |
| <i>B. alpinus</i> (ss) | LT546421 | RM3-1-8  | alp_Be_H4  | Central Alps | Switzerland | This study                                                |
| <i>B. alpinus</i> (ss) | LT546422 | Ri8-1-1  | alp_Bw_H1  | Central Alps | Switzerland | This study                                                |
| <i>B. alpinus</i> (ss) | LT546423 | Ri8-2-2  | alp_Bw_H2  | Central Alps | Switzerland | This study                                                |
| <i>B. alpinus</i> (ss) | LT546423 | LT3-1-2  | alp_Bw_H2  | Central Alps | Switzerland | This study                                                |
| <i>B. alpinus</i> (ss) | LT546423 | LT3-1-3  | alp_Bw_H2  | Central Alps | Switzerland | This study                                                |
| <i>B. alpinus</i> (ss) | LT546424 | LT2-1-8  | alp_Bw_H3  | Central Alps | Switzerland | This study                                                |
| <i>B.melanonyx</i>     | LT546425 | Ri8-2-3  | mel_CH_H2  | Central Alps | Switzerland | This study                                                |
| <i>B.melanonyx</i>     | LT546426 | Ri4-1-2  | mel_CH_H3  | Central Alps | Switzerland | This study                                                |
| <i>B.melanonyx</i>     | LT546427 | Ri10-1-1 | mel_CH_H4  | Central Alps | Switzerland | This study                                                |
| <i>B. alpinus</i> (ss) | JQ683695 | NA       | SN_Pyr_H23 | Pyrenees     | France      | Finn et al.(2013) <i>Global Ecol. Biogeogr.</i> ,22:40-51 |
| <i>B. alpinus</i> (ss) | JQ683694 | NA       | SN_Pyr_H22 | Pyrenees     | France      | Finn et al.(2013) <i>Global Ecol. Biogeogr.</i> ,22:40-51 |
| <i>B. alpinus</i> (ss) | JQ683693 | NA       | SN_Pyr_H21 | Pyrenees     | France      | Finn et al.(2013) <i>Global Ecol. Biogeogr.</i> ,22:40-51 |
| <i>B. alpinus</i> (ss) | JQ683692 | NA       | SN_Pyr_H20 | Pyrenees     | France      | Finn et al.(2013) <i>Global Ecol. Biogeogr.</i> ,22:40-51 |
| <i>B. alpinus</i> (ss) | JQ683691 | NA       | SN_Pyr_H19 | Pyrenees     | France      | Finn et al.(2013) <i>Global Ecol. Biogeogr.</i> ,22:40-51 |
| <i>B. alpinus</i> (ss) | JQ683690 | NA       | SN_Pyr_H18 | Pyrenees     | France      | Finn et al.(2013) <i>Global Ecol. Biogeogr.</i> ,22:40-51 |
| <i>B. alpinus</i> (ss) | JQ683689 | NA       | SN_Pyr_H17 | Pyrenees     | France      | Finn et al.(2013) <i>Global Ecol. Biogeogr.</i> ,22:40-51 |
| <i>B. alpinus</i> (ss) | JQ683688 | NA       | SN_Pyr_H16 | Pyrenees     | France      | Finn et al.(2013) <i>Global Ecol. Biogeogr.</i> ,22:40-51 |
| <i>B. alpinus</i> (ss) | JQ683687 | NA       | SN_Pyr_H15 | Pyrenees     | France      | Finn et al.(2013) <i>Global Ecol. Biogeogr.</i> ,22:40-51 |
| <i>B. alpinus</i> (ss) | JQ683686 | NA       | SN_Pyr_H14 | Pyrenees     | France      | Finn et al.(2013) <i>Global Ecol. Biogeogr.</i> ,22:40-51 |

|                        |          |              |            |                    |        |                                                                               |
|------------------------|----------|--------------|------------|--------------------|--------|-------------------------------------------------------------------------------|
| <i>B. alpinus</i> (ss) | JQ683685 | NA           | SN_Pyr_H13 | Pyrenees           | France | Finn et al.(2013) <i>Global Ecol. Biogeogr.</i> ,22:40-51                     |
| <i>B. alpinus</i> (ss) | JQ683684 | NA           | SN_Pyr_H12 | Pyrenees           | France | Finn et al.(2013) <i>Global Ecol. Biogeogr.</i> ,22:40-51                     |
| <i>B. alpinus</i> (ss) | JQ683683 | NA           | SN_Pyr_H11 | Pyrenees           | France | Finn et al.(2013) <i>Global Ecol. Biogeogr.</i> ,22:40-51                     |
| <i>B. alpinus</i> (ss) | JQ683682 | NA           | SN_Pyr_H10 | Pyrenees           | France | Finn et al.(2013) <i>Global Ecol. Biogeogr.</i> ,22:40-51                     |
| <i>B. alpinus</i> (ss) | JQ683681 | NA           | SN_Pyr_H9  | Pyrenees           | France | Finn et al.(2013) <i>Global Ecol. Biogeogr.</i> ,22:40-51                     |
| <i>B. alpinus</i> (ss) | JQ683680 | NA           | SN_Pyr_H8  | Pyrenees           | France | Finn et al.(2013) <i>Global Ecol. Biogeogr.</i> ,22:40-51                     |
| <i>B. alpinus</i> (ss) | JQ683679 | NA           | SN_Pyr_H7  | Pyrenees           | France | Finn et al.(2013) <i>Global Ecol. Biogeogr.</i> ,22:40-51                     |
| <i>B. alpinus</i> (ss) | JQ683678 | NA           | SN_Pyr_H6  | Pyrenees           | France | Finn et al.(2013) <i>Global Ecol. Biogeogr.</i> ,22:40-51                     |
| <i>B. alpinus</i> (ss) | JQ683677 | NA           | SN_Pyr_H5  | Pyrenees           | France | Finn et al.(2013) <i>Global Ecol. Biogeogr.</i> ,22:40-51                     |
| <i>B. alpinus</i> (ss) | JQ683676 | NA           | SN_Pyr_H4  | Pyrenees           | France | Finn et al.(2013) <i>Global Ecol. Biogeogr.</i> ,22:40-51                     |
| <i>B. alpinus</i> (ss) | JQ683675 | NA           | SN_Pyr_H3  | Pyrenees           | France | Finn et al.(2013) <i>Global Ecol. Biogeogr.</i> ,22:40-51                     |
| <i>B. alpinus</i> (ss) | JQ683674 | NA           | SN_Pyr_H2  | Pyrenees           | France | Finn et al.(2013) <i>Global Ecol. Biogeogr.</i> ,22:40-51                     |
| <i>B. alpinus</i> (ss) | JQ683673 | NA           | SN_Pyr_H1  | Pyrenees           | France | Finn et al.(2013) <i>Global Ecol. Biogeogr.</i> ,22:40-51                     |
| <i>B. alpinus</i> (ss) | KF468683 | NA           | Picos_A_H1 | Picos de Europa    | Spain  | Finn et al. (2014) <i>Freshwater Sciences</i> , 33:1-11                       |
| <i>B. alpinus</i> (ss) | KF468682 | NA           | Pyr_B_H4   | Pyrenees           | France | Finn et al. (2014) <i>Freshwater Sciences</i> , 33:1-11                       |
| <i>B. alpinus</i> (ss) | KF468681 | NA           | Pyr_B_H3   | Pyrenees           | France | Finn et al. (2014) <i>Freshwater Sciences</i> , 33:1-11                       |
| <i>B. alpinus</i> (ss) | KF468680 | NA           | Pyr_B_H2   | Pyrenees           | France | Finn et al. (2014) <i>Freshwater Sciences</i> , 33:1-11                       |
| <i>B. alpinus</i> (ss) | KF468679 | NA           | Pyr_B_H1   | Pyrenees           | France | Finn et al. (2014) <i>Freshwater Sciences</i> , 33:1-11                       |
| <i>B. alpinus</i> (ss) | KF468678 | NA           | SN_B_H5    | Sierra Nevada      | Spain  | Finn et al. (2014) <i>Freshwater Sciences</i> , 33:1-11                       |
| <i>B. alpinus</i> (ss) | KF468677 | NA           | SN_B_H4    | Sierra Nevada      | Spain  | Finn et al. (2014) <i>Freshwater Sciences</i> , 33:1-11                       |
| <i>B. alpinus</i> (ss) | KF468676 | NA           | SN_B_H3    | Sierra Nevada      | Spain  | Finn et al. (2014) <i>Freshwater Sciences</i> , 33:1-11                       |
| <i>B. alpinus</i> (ss) | KF468675 | NA           | SN_B_H2    | Sierra Nevada      | Spain  | Finn et al. (2014) <i>Freshwater Sciences</i> , 33:1-11                       |
| <i>B. alpinus</i> (ss) | KF468674 | NA           | SN_B_H1    | Sierra Nevada      | Spain  | Finn et al. (2014) <i>Freshwater Sciences</i> , 33:1-11                       |
| <i>B. alpinus</i> (ss) | KF468673 | NA           | SN_Pyr_H25 | Sierra Nevada      | Spain  | Finn et al. (2014) <i>Freshwater Sciences</i> , 33:1-11                       |
| <i>B. alpinus</i> (ss) | KF468672 | NA           | SN_Pyr_H24 | Sierra Nevada      | Spain  | Finn et al. (2014) <i>Freshwater Sciences</i> , 33:1-11                       |
| <i>B. alpinus</i> (sl) | HG935018 | BA-47-IT(LI) | BA-47-IT   | Ligurian Appenines | Italia | Gattolliat et al. (2015) <i>Arthropod systematics and Phylogeny</i> , 73:3-18 |
| <i>B. alpinus</i> (sl) | HG935017 | BA-45-IT(LI) | BA-45-IT   | Ligurian Appenines | Italia | Gattolliat et al. (2015) <i>Arthropod systematics and Phylogeny</i> , 73:3-18 |
| <i>B. alpinus</i> (sl) | HG935016 | BA-44-FR(ME) | alp_A_H13  | Maritime Alps      | France | Gattolliat et al. (2015) <i>Arthropod systematics and Phylogeny</i> , 73:3-18 |
| <i>B. alpinus</i> (sl) | HG935015 | BA-43-FR(ME) | alp_A_H9   | Maritime Alps      | France | Gattolliat et al. (2015) <i>Arthropod systematics and Phylogeny</i> , 73:3-18 |
| <i>B. alpinus</i> (sl) | HG935013 | BA-36-FR(MV) | BA-36-FR   | Maritime Alps      | France | Gattolliat et al. (2015) <i>Arthropod systematics and Phylogeny</i> , 73:3-18 |

|                        |          |                 |           |                   |             |                                                                               |
|------------------------|----------|-----------------|-----------|-------------------|-------------|-------------------------------------------------------------------------------|
| <i>B. alpinus (sl)</i> | HG935012 | BA-34-IT(AP)    | BA-34-IT  | Central Appenines | Italia      | Gattolliat et al. (2015) <i>Arthropod systematics and Phylogeny</i> , 73:3-18 |
| <i>B. alpinus (sl)</i> | HG935011 | BA-33-IT(AP)    | BA-33-IT  | Central Appenines | Italia      | Gattolliat et al. (2015) <i>Arthropod systematics and Phylogeny</i> , 73:3-18 |
| <i>B. melanonyx</i>    | NA       | FR_SR28D05_B    | mel_FR_H1 | NA                | France      | Unpublished (S. Rutschmann & M.T. Monaghan)                                   |
| <i>B. nubecularis</i>  | NA       | CH041_SR21F05_B | nub_CH_H1 | Central Alps      | Switzerland | Unpublished (S. Rutschmann & M.T. Monaghan)                                   |
| <i>B. nubecularis</i>  | NA       | CH051_SR21H08_B | nub_CH_H2 | Central Alps      | Switzerland | Unpublished (S. Rutschmann & M.T. Monaghan)                                   |
| <i>B. rhodani</i>      | KF438126 | CH_745580_neo   | rhodani   | Central Alps      | Switzerland | Rutschmann et al. (2014) <i>Freshwater biology</i> , 59: 2516–2527            |

#### References:

- Finn DS, Khamis K, Milner AM: **Loss of small glaciers will diminish beta diversity in Pyrenean streams at two levels of biological organization.** *Global Ecology and Biogeography* 2013, **22**(1):40-51.
- Finn DS, Zamora-Muñoz C, Múrria C, Sáinz-Bariáin M, Alba-Tercedor J: **Evidence from recently deglaciated mountain ranges that *Baetis alpinus* (Ephemeroptera) could lose significant genetic diversity as alpine glaciers disappear.** *Freshwater Science* 2014, **33**(1):207-216.
- Gattolliat J-L, Cavallo E, Vuataz L, Sartori M: **DNA barcoding of Corsican mayflies (Ephemeroptera) with implications on biogeography, systematics and biodiversity.** *Arthropod Systematics & Phylogeny* 2015, **73**(1):3-18
- Rutschmann S, Gattolliat J-L, Hughes SJ, Baez M, Sartori M, Monaghan MT: **Evolution and island endemism of morphologically cryptic *Baetis* and *Cloeon* species (Ephemeroptera, Baetidae) on the Canary Islands and Madeira.** *Freshwater Biology* 2014, **59**:2516-2527.

**Table S4. COI sequence divergence between clades.** Mean % sequence divergence between *Baetis alpinus* clades assuming the best-fit (Tamura-Nei) nucleotide substitution model and measured at the Cytochrome Oxidase I (COI) barcoding marker. (Pyr\_B, SN\_Pyr, SN\_B, Picos\_A correspond to Generalized Mixed Yule-Coalescent (GMYC) entities identified in Finn *et al.* (2014). BA-45-IT and BA-36-FR correspond to single haplotypes described in Gattolliat *et al.* (2015).

| Entities              | <i>B. alpinus</i>     |                     |             |             |               |                | <i>Baetis. gr. alpinus</i> |             |                 |                 |
|-----------------------|-----------------------|---------------------|-------------|-------------|---------------|----------------|----------------------------|-------------|-----------------|-----------------|
|                       | <i>B. nubecularis</i> | <i>B. melanonyx</i> | <i>LinB</i> | <i>LinA</i> | <i>SN_Pyr</i> | <i>Picos_A</i> | <i>Pyr_B</i>               | <i>SN_B</i> | <i>BA-45-IT</i> | <i>BA-36-FR</i> |
| <i>B. nubecularis</i> | 0.005                 |                     |             |             |               |                |                            |             |                 |                 |
| <i>B. melanonyx</i>   | 0.249                 | 0.069               |             |             |               |                |                            |             |                 |                 |
| <i>LinB</i>           | 0.186                 | 0.246               | 0.045       |             |               |                |                            |             |                 |                 |
| <i>LinA</i>           | 0.049                 | 0.243               | 0.189       | 0.012       |               |                |                            |             |                 |                 |
| <i>SN_Pyr</i>         | 0.061                 | 0.253               | 0.182       | 0.055       | 0.023         |                |                            |             |                 |                 |
| <i>Picos_A</i>        | 0.067                 | 0.248               | 0.183       | 0.058       | 0.054         | NA             |                            |             |                 |                 |
| <i>Pyr_B</i>          | 0.191                 | 0.274               | 0.081       | 0.201       | 0.198         | 0.199          | 0.002                      |             |                 |                 |
| <i>SN_B</i>           | 0.189                 | 0.232               | 0.197       | 0.193       | 0.202         | 0.210          | 0.194                      | 0.007       |                 |                 |
| <i>BA-45-IT</i>       | 0.254                 | 0.256               | 0.249       | 0.252       | 0.255         | 0.239          | 0.235                      | 0.243       | NA              |                 |
| <i>BA-36-FR</i>       | 0.262                 | 0.274               | 0.271       | 0.254       | 0.257         | 0.245          | 0.274                      | 0.257       | 0.156           | NA              |

References:

- Finn DS, Zamora-Muñoz C, Múrria C, Sáinz-Bariáin M, Alba-Tercedor J: **Evidence from recently deglaciated mountain ranges that *Baetis alpinus* (Ephemeroptera) could lose significant genetic diversity as alpine glaciers disappear.** *Freshwater Science* 2014, **33**(1):207-216.
- Gattolliat J-L, Cavallo E, Vuataz L, Sartori M: **DNA barcoding of Corsican mayflies (Ephemeroptera) with implications on biogeography, systematics and biodiversity.** *Arthropod Systematics & Phylogeny* 2015, **73**(1):3-18

**Table S5. Locus-specific and multilocus genetic diversity and differentiation estimates.** Locus-specific and multilocus genetic diversity measures and genetic differentiation ( $F_{ST}$ ) following Weir & Cockerham (1984) estimated across all populations within two *B. alpinus* lineages (A and B) and *B. melanonyx*.  $A_t$ , total number of alleles;  $A_r$ , allelic richness;  $H_O$ , observed heterozygosity;  $H_E$ , and gene diversity; Genetic differentiation ( $F_{ST}$ ) following Weir & Cockerham (1984). Significance of genetic differentiation was tested using 10,000 randomizations (\* $P < 0.0001$ ). Bonferroni corrections were applied to the mean  $F$ -statistic estimate. Allelic size ranges in base pairs (bp) are indicated for each locus.

| Locus                        | $A_t$ | $A_r$ | $H_O$ | $H_E$ | Allelic size range(bp) | $F_{ST}$ |
|------------------------------|-------|-------|-------|-------|------------------------|----------|
| <b><i>B. alpinus</i> (A)</b> |       |       |       |       |                        |          |
| <i>Ba_c1</i>                 | 19    | 7.017 | 0.732 | 0.767 | 84 - 103               | 0.093*   |
| <i>Ba_g4</i>                 | 47    | 8.282 | 0.807 | 0.852 | 93 - 224               | 0.031*   |
| <i>Ba_g3</i>                 | 35    | 6.660 | 0.751 | 0.809 | 74 - 163               | 0.036*   |
| <i>Ba_g2</i>                 | 45    | 9.490 | 0.786 | 0.819 | 136 - 219              | 0.093*   |
| <i>Ba_g1</i>                 | 36    | 7.118 | 0.731 | 0.789 | 62 - 137               | 0.066*   |
| <i>Ba_g6</i>                 | 19    | 4.905 | 0.643 | 0.663 | 87 - 133               | 0.117*   |
| <i>Ba_g5</i>                 | 29    | 7.561 | 0.731 | 0.811 | 165 - 219              | 0.058*   |
| <i>Ba_c4</i>                 | 30    | 8.607 | 0.834 | 0.853 | 199 - 242              | 0.055*   |
| <i>Ba_c3</i>                 | 38    | 7.370 | 0.737 | 0.802 | 181 - 228              | 0.061*   |
| <i>Ba_c2</i>                 | 12    | 3.633 | 0.336 | 0.422 | 180 - 202              | 0.160*   |
| Average                      | 31    | 7.064 | 0.709 | 0.759 |                        | 0.073*   |
| <b><i>B. alpinus</i> (B)</b> |       |       |       |       |                        |          |
| <i>Ba_c1</i>                 | 14    | 4.351 | 0.518 | 0.598 | 86 - 101               | 0.072*   |
| <i>Ba_g4</i>                 | 25    | 6.190 | 0.647 | 0.731 | 98 - 198               | 0.046*   |

|                            |     |        |       |       |           |        |
|----------------------------|-----|--------|-------|-------|-----------|--------|
| <i>Ba_g3</i>               | 8   | 3.356  | 0.530 | 0.534 | 76 - 126  | 0.185* |
| <i>Ba_g2</i>               | 26  | 4.734  | 0.583 | 0.587 | 135 - 182 | 0.052* |
| <i>Ba_g1</i>               | 16  | 4.945  | 0.612 | 0.629 | 65 - 100  | 0.148* |
| <i>Ba_g6</i>               | 4   | 1.000  | 0.075 | 0.042 | 93 - 104  | 0.538* |
| <i>Ba_g5</i>               | 8   | 1.981  | 0.202 | 0.179 | 171 - 192 | 0.065* |
| <i>Ba_c4</i>               | 18  | 7.823  | 0.755 | 0.821 | 211 - 230 | 0.053* |
| <i>Ba_c3</i>               | 40  | 8.027  | 0.601 | 0.748 | 173 - 238 | 0.061* |
| <i>Ba_c2</i>               | 11  | 3.914  | 0.632 | 0.675 | 188 - 200 | 0.039* |
| Average                    | 17  | 4.632  | 0.516 | 0.554 |           | 0.081* |
| <b><i>B. melanonyx</i></b> |     |        |       |       |           |        |
| <i>Ba_c1</i>               | 4   | 1.344  | 0.007 | 0.014 | 85 - 095  | 0.000  |
| <i>Ba_g4</i>               | 22  | 7.834  | 0.758 | 0.926 | 94 - 157  | 0.022* |
| <i>Ba_g3</i>               | 5   | 3.852  | 0.28  | 0.468 | 76 - 086  | 0.059  |
| <i>Ba_g2</i>               | 13  | 4.094  | 0.517 | 0.785 | 143 - 178 | 0.135* |
| <i>Ba_g1</i>               | 13  | 5.661  | 0.586 | 0.721 | 62 - 102  | 0.176* |
| <i>Ba_g6</i>               | 5   | 2.433  | 0.021 | 0.211 | 87 - 097  | 0.205* |
| <i>Ba_g5</i>               | 4   | 2.088  | 0.35  | 0.358 | 171 - 192 | 0.170* |
| <i>Ba_c4</i>               | 12  | 5.583  | 0.787 | 0.656 | 198 - 224 | 0.159* |
| <i>Ba_c3</i>               | 6   | 2.961  | 0.286 | 0.559 | 189 - 196 | 0.134* |
| <i>Ba_c2</i>               | 11  | 5.041  | 0.569 | 0.57  | 172 - 201 | 0.167* |
| Average                    | 9.5 | 4.0891 | 0.416 | 0.527 |           | 0.127* |

Reference:

Weir BS, Cockerham CC: **Estimating *F*-statistics for the analysis of population structure.** *Evolution* 1984, **38**(6):1358-1370

**Table S6. Null allele frequency estimates.** Null allele frequency estimates per locus and population calculated following Dempster *et al.* (1977) in GENEPOP for populations containing a minimum of eight individuals. High probabilities of null alleles ( $\geq 0.2$ ) are highlighted in grey.

| <i>B. alpinus</i> (A) |       |       |       |       |       |       |       |       |       |       |       |       |       |       |       |       |       |       |       |       |       |
|-----------------------|-------|-------|-------|-------|-------|-------|-------|-------|-------|-------|-------|-------|-------|-------|-------|-------|-------|-------|-------|-------|-------|
|                       | Ri12  | Ri8   | Ri13  | Po1   | Ri3   | Po2   | JM1   | JM2   | JT1   | JT3   | JT5   | Ri2   | Ro2   | LM1   | LM2   | LM3   | LM4   | LM5   | LT1   | LT2   | LT3   |
| <i>Ba_c1</i>          | 0.037 | 0.091 | 0.001 | 0     | 0.118 | 0.015 | 0     | 0.085 | 0     | 0     | 0.016 | 0.099 | 0     | 0.027 | 0     | 0     | 0     | 0.085 | 0     | 0     | 0     |
| <i>Ba_g4</i>          | 0.14  | 0     | 0     | 0.039 | 0.095 | 0     | 0.05  | 0     | 0     | 0     | 0.031 | 0     | 0.051 | 0     | 0     | 0.055 | 0     | 0.006 | 0.043 | 0     | 0     |
| <i>Ba_g3</i>          | 0.26  | 0.076 | 0.043 | 0.017 | 0     | 0     | 0.013 | 0     | 0     | 0.015 | 0.036 | 0     | 0     | 0.031 | 0     | 0     | 0     | 0     | 0     | 0.015 | 0     |
| <i>Ba_g2</i>          | 0.048 | 0     | 0     | 0.027 | 0.125 | 0     | 0     | 0.013 | 0     | 0     | 0.038 | 0     | 0     | 0.038 | 0.038 | 0     | 0.134 | 0.067 | 0     | 0     | 0.06  |
| <i>Ba_g1</i>          | 0.058 | 0     | 0.131 | 0.051 | 0.104 | 0     | 0     | 0     | 0.033 | 0     | 0.022 | 0.013 | 0.024 | 0     | 0.012 | 0.04  | 0.022 | 0.067 | 0.056 | 0     | 0.081 |
| <i>Ba_g6</i>          | 0     | 0.061 | 0.022 | 0.002 | 0     | 0.058 | 0     | 0     | 0     | 0.016 | 0.07  | 0     | 0.026 | 0     | 0     | 0     | 0     | 0.008 | 0.042 | 0     | 0     |
| <i>Ba_g5</i>          | 0.01  | 0     | 0.044 | 0     | 0.133 | 0.016 | 0     | 0.03  | 0     | 0     | 0     | 0.091 | 0.003 | 0.024 | 0.038 | 0.081 | 0.074 | 0.039 | 0.038 | 0     | 0     |
| <i>Ba_c4</i>          | 0     | 0     | 0     | 0.034 | 0     | 0     | 0     | 0.021 | 0.102 | 0     | 0.015 | 0.028 | 0     | 0     | 0.083 | 0.029 | 0.008 | 0.03  | 0.053 | 0     | 0     |
| <i>Ba_c3</i>          | 0.027 | 0.007 | 0.035 | 0.015 | 0.029 | 0     | 0     | 0.043 | 0     | 0     | 0     | 0     | 0.043 | 0.006 | 0.107 | 0.017 | 0.007 | 0.037 | 0.065 | 0.193 | 0     |
| <i>Ba_c2</i>          | 0.085 | 0.08  | 0.057 | 0.043 | 0     | 0     | 0.068 | 0.025 | 0     | 0.247 | 0     | 0.041 | 0.017 | 0.056 | 0     | 0.09  | 0     | 0     | 0.086 | 0     | 0     |
|                       | LT4   | LT5   | Da3   | Da1   | Da2   | Ri14  | Ro5   | Ri11  | Ro1   | RM1   | RM2   | RM3   | RT3   | Ri9   | Ri4   | Ri7   | Ro4   | Ro3   | Ri5   | Ri6   |       |
| <i>Ba_c1</i>          | 0     | 0.011 | 0.063 | 0     | 0     | 0.025 | 0     | 0     | 0     | 0     | 0     | 0.037 | 0     | 0     | 0     | 0.09  | 0     | 0.033 | 0     | 0     |       |
| <i>Ba_g4</i>          | 0     | 0     | 0     | 0.032 | 0.008 | 0     | 0     | 0     | 0     | 0.038 | 0     | 0.076 | 0     | 0     | 0.111 | 0.083 | 0.017 | 0     | 0     | 0.04  |       |
| <i>Ba_g3</i>          | 0     | 0     | 0     | 0     | 0.077 | 0     | 0.006 | 0     | 0.132 | 0.049 | 0.086 | 0.044 | 0     | 0     | 0     | 0.065 | 0.036 | 0     | 0     | 0.013 |       |
| <i>Ba_g2</i>          | 0     | 0.036 | 0.01  | 0.007 | 0.023 | 0.033 | 0.133 | 0     | 0     | 0.041 | 0     | 0.017 | 0.016 | 0     | 0.081 | 0.015 | 0     | 0.048 | 0     | 0.024 |       |
| <i>Ba_g1</i>          | 0     | 0     | 0.006 | 0.007 | 0.007 | 0.187 | 0     | 0.014 | 0.077 | 0     | 0     | 0.043 | 0     | 0.067 | 0.202 | 0     | 0.103 | 0     | 0.049 | 0.078 |       |
| <i>Ba_g6</i>          | 0     | 0.007 | 0.083 | 0.087 | 0.052 | 0.028 | 0     | 0     | 0.021 | 0     | 0     | 0     | 0     | 0     | 0     | 0.044 | 0     | 0.017 | 0.005 | 0.014 |       |
| <i>Ba_g5</i>          | 0     | 0.006 | 0     | 0.096 | 0.093 | 0     | 0.013 | 0.035 | 0     | 0.161 | 0.169 | 0     | 0.107 | 0.14  | 0     | 0.08  | 0     | 0.048 | 0     | 0.021 |       |
| <i>Ba_c4</i>          | 0.111 | 0     | 0.027 | 0     | 0     | 0     | 0.127 | 0     | 0     | 0.041 | 0.081 | 0     | 0     | 0     | 0     | 0.023 | 0     | 0.021 | 0.039 | 0.07  |       |
| <i>Ba_c3</i>          | 0     | 0     | 0.022 | 0.082 | 0.081 | 0     | 0     | 0.024 | 0     | 0.051 | 0.144 | 0.099 | 0     | 0.051 | 0     | 0.043 | 0.052 | 0.011 | 0     | 0.097 |       |
| <i>Ba_c2</i>          | 0     | 0     | 0.067 | 0     | 0.06  | 0     | 0.134 | 0.064 | 0.005 | 0.238 | 0     | 0     | 0     | 0     | 0     | 0.114 | 0.058 | 0.018 | 0.142 | 0.012 |       |
| <i>B. alpinus</i> (B) |       |       |       |       |       |       |       |       |       |       |       |       |       |       |       |       |       |       |       |       |       |
|                       | Ri1   | JM1   | JT1   | JT2   | JT3   | JT4   | LT1   | LT2   | LT3   | LT4   | Ro1   | RM2   | RT1   | RT2   | RT3   | RT4   | Ri7   |       |       |       |       |
| <i>Ba_c1</i>          | 0.067 | 0.032 | 0     | 0     | 0     | 0.035 | 0.193 | 0     | 0.046 | 0.018 | 0.069 | 0.013 | 0     | 0.031 | 0.056 | 0.037 | 0.057 |       |       |       |       |
| <i>Ba_g4</i>          | 0     | 0     | 0.136 | 0.047 | 0.048 | 0.075 | 0.061 | 0.03  | 0.009 | 0     | 0.043 | 0.101 | 0.021 | 0     | 0     | 0.034 | 0.025 |       |       |       |       |

|              |       |       |       |       |       |       |       |       |       |       |       |       |       |       |       |       |       |
|--------------|-------|-------|-------|-------|-------|-------|-------|-------|-------|-------|-------|-------|-------|-------|-------|-------|-------|
| <i>Ba_g3</i> | 0     | 0.02  | 0.052 | 0.063 | 0     | 0.083 | NA    | 0     | 0.067 | 0     | 0.106 | 0.037 | 0.055 | 0.006 | 0.047 | 0     | 0.218 |
| <i>Ba_g2</i> | 0.027 | 0     | 0.067 | 0.031 | 0     | 0.028 | 0     | 0.06  | 0     | 0     | 0.066 | 0     | 0     | 0.075 | 0     | 0.041 | 0     |
| <i>Ba_g1</i> | 0     | 0     | 0     | 0.002 | 0     | 0     | 0     | 0.006 | 0.033 | 0     | 0     | 0.01  | 0     | 0     | 0     | 0     | 0     |
| <i>Ba_g6</i> | NA    | NA    | NA    | NA    | NA    | NA    | NA    | NA    | NA    | NA    | NA    | NA    | NA    | NA    | NA    | NA    | NA    |
| <i>Ba_g5</i> | 0     | 0.123 | 0     | 0     | 0     | 0     | NA    | NA    | 0     | NA    | 0     | 0.017 | 0     | 0     | 0     | 0     | 0     |
| <i>Ba_c4</i> | 0.023 | 0.008 | 0     | 0     | 0     | 0     | 0.187 | 0.129 | 0.117 | 0     | 0.065 | 0     | 0.033 | 0     | 0.042 | 0     | 0     |
| <i>Ba_c3</i> | 0.056 | 0.097 | 0     | 0.061 | 0.057 | 0.154 | NA    | 0.063 | 0     | 0     | 0.1   | 0     | 0.064 | 0.051 | 0.054 | 0     | 0     |
| <i>Ba_c2</i> | 0.091 | 0.067 | 0     | 0     | 0.041 | 0.009 | 0.042 | 0     | 0     | 0.114 | 0     | 0     | 0     | 0     | 0.048 | 0.04  | 0     |

---

***B. melanonyx***

|              | <b>Ri8</b> | <b>Ri10</b> | <b>LT4</b> | <b>Ri4</b> |
|--------------|------------|-------------|------------|------------|
| <i>Ba_c1</i> | NA         | NA          | NA         | 0.1        |
| <i>Ba_g4</i> | 0.205      | 0.226       | 0          | 0.3        |
| <i>Ba_g3</i> | 0          | 0.144       | 0.016      | 0.142      |
| <i>Ba_g2</i> | 0.319      | 0.1         | 0.302      | 0.072      |
| <i>Ba_g1</i> | 0.083      | 0           | 0          | 0.029      |
| <i>Ba_g6</i> | 0.224      | 0           | 0.267      | 0.117      |
| <i>Ba_g5</i> | 0          | 0           | 0          | 0.058      |
| <i>Ba_c4</i> | 0          | 0           | 0          | 0.017      |
| <i>Ba_c3</i> | 0          | 0.31        | 0.178      | 0.201      |
| <i>Ba_c2</i> | 0.166      | 0.056       | 0          | 0.303      |

---

Reference:

Dempster AP, Laird NM, Rubin DB: **Maximum Likelihood from incomplete data via the EM Algorithm** *Journal of the Royal Statistical Society Series B (Methodological)* 1977, **39**:1-38.

**Table S7. Generalized linear model results.** Generalized linear models determining the factors explaining the relative abundance of *B. alpinus* A and B lineages performed at (A) the regional scale and (B) the local scale (B). Estimates and significance of the fixed effect  $\beta$  parameters of the best fit models indicated in bold are shown.

| Model selection    |                            |        |          |                 |              |
|--------------------|----------------------------|--------|----------|-----------------|--------------|
| Effect             | $\beta$ parameter estimate | (S.E.) | Deviance | <i>F</i> -value | <i>P</i>     |
| A. Intercept       | 9.182                      | 3.166  |          |                 |              |
| <b>Elevation</b>   | -0.004                     | 0.002  | 373.510  | 12.867          | <i>0.002</i> |
| Drainage           |                            |        | 252.380  | 0.520           | 0.673        |
| B. Intercept       | 0.9891                     | 0.67   |          |                 |              |
| <b>Stream-type</b> | -1.8983                    | 0.65   | 394.8    | 9.4228          | <i>0.006</i> |
| <b>Valley (Ro)</b> | 1.4571                     | 0.71   | 393.51   | 4.6633          | <i>0.022</i> |
| <b>Valley (Da)</b> | -0.6958                    | 0.75   |          |                 |              |

The following statistics are given: estimates and standard errors (S.E.) of the  $\beta$  parameters, Deviance, *F*-value and *P*-value of the likelihood ratio *F*-test. *P*-values  $\leq 0.05$  are given in italics.
