# Supplementary material for: Distribution and population genetic variation of cryptic species of the Alpine mayfly Baetis alpinus (Ephemeroptera: Baetidae) in the Central Alps
Source: PubMed Central journal article supplement (PMC4828801; doi:10.1186/s12862-016-0643-y), 2016-04-12
Supplement: 12862_2016_643_MOESM4_ESM.pdf [file 12862_2016_643_MOESM4_ESM.pdf]

**Additional file 4. Results from Bayesian clustering (STRUCTURE).**

Individual assignment results from Bayesian clustering following Pritchard *et al.* (2000) performed on **(a)** 1591 individuals of the *B. alpinus* group (*s.l.*), including *B. alpinus* and *B. melanonyx* (corrected for multimodality) and, **(b)** *B. alpinus* cryptic lineages and *B. melanonyx* datasets separately. **(c)** STRUCTURE results for separate *B. alpinus* cryptic lineages and *B. melanonyx* datasets: mean ( $\pm$ SD) probabilities of the data  $\ln \Pr(X|K)$  over 30 replicated runs plotted as a function of the putative number of clusters  $K$  (blue dots) and the standardized second-order rate of change of  $\ln \Pr(X|K)$ ,  $\Delta K$ , as a function of  $K$  (red dots).

**a**

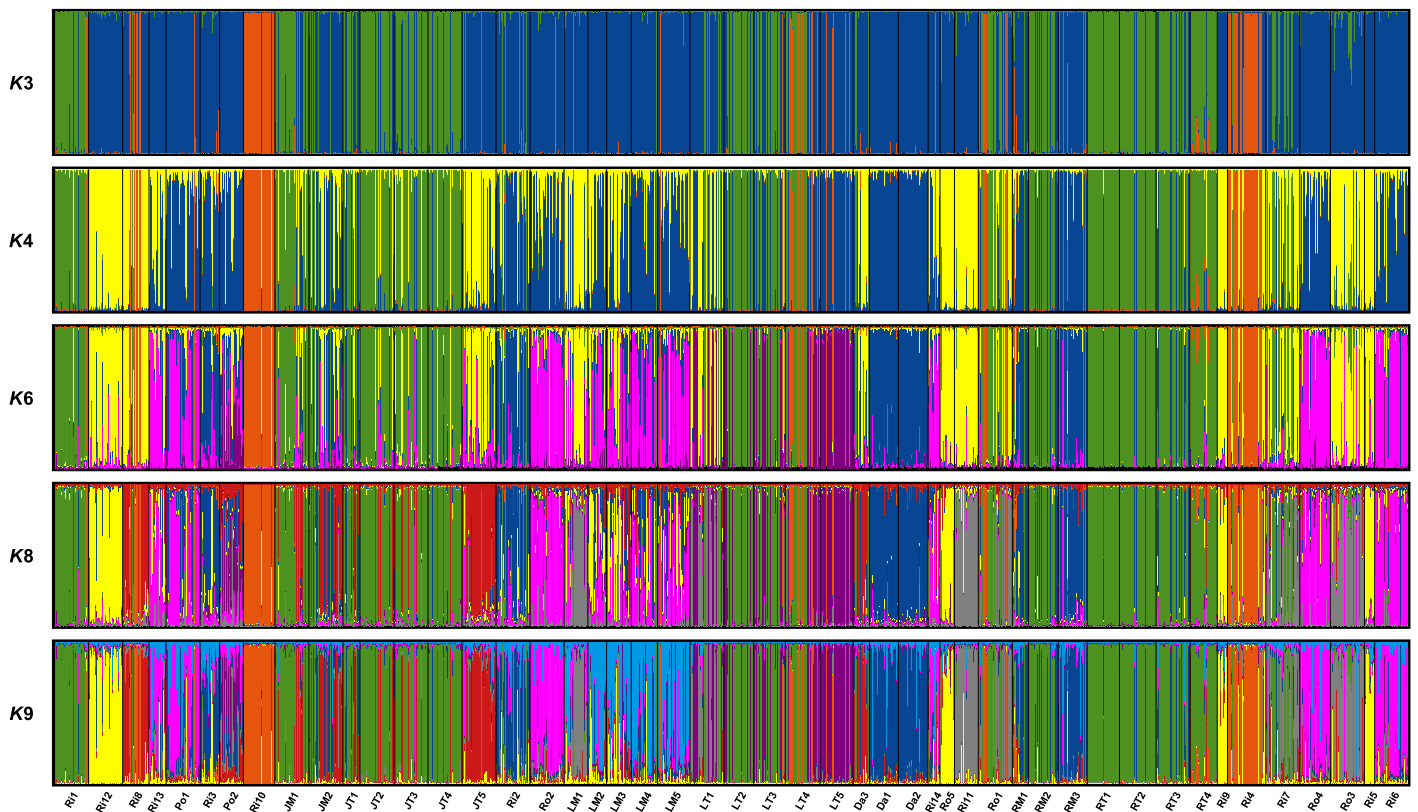

**b**

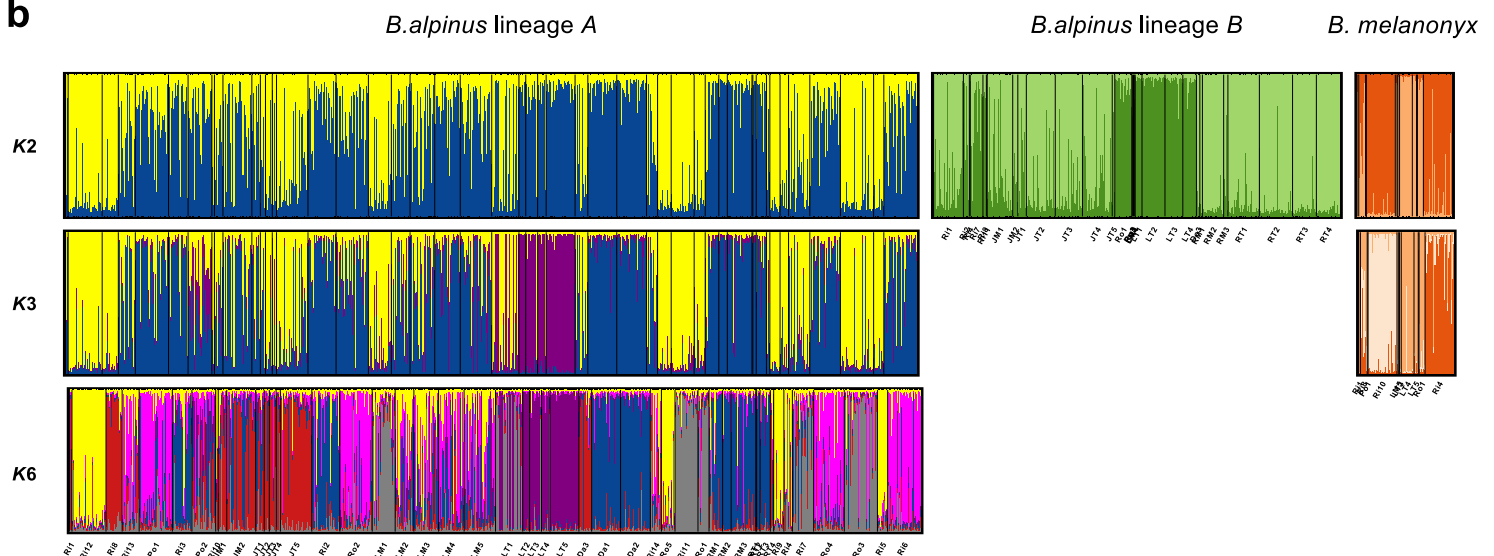

C

***B. alpinus* lineage A**

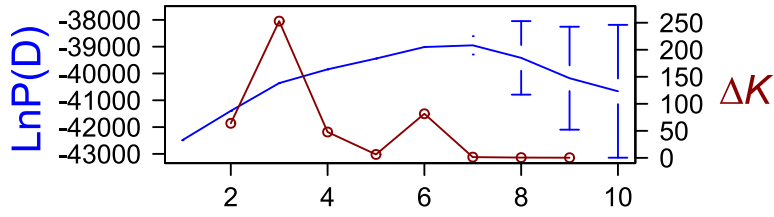

***B. alpinus* lineage B**

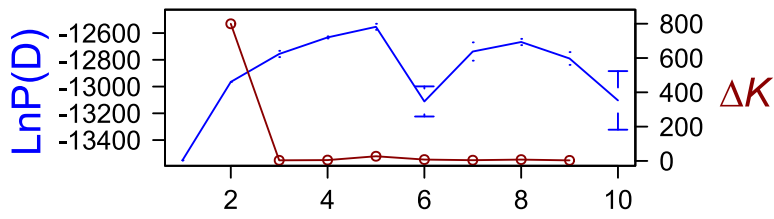

***B. melanonyx***

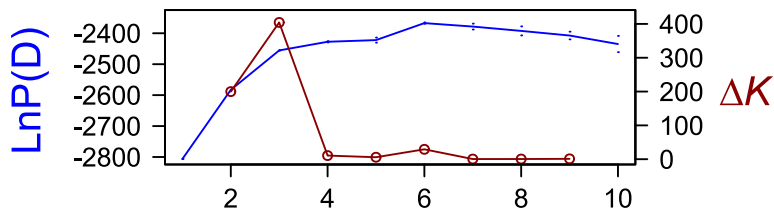

Reference:

Pritchard JK, Stephens M, Donnelly P: **Inference of population structure using multilocus genotype data.** *Genetics* 2000, **155**(2):945-959.
